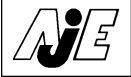

## Original Contribution

# Body Mass Index in Adolescence in Relation to Cause-specific Mortality: A Follow-up of 230,000 Norwegian Adolescents

Tone Bjørge<sup>1,2</sup>, Anders Engeland<sup>1,3</sup>, Aage Tverdal<sup>3</sup>, and George Davey Smith<sup>4</sup>

<sup>1</sup> Section for Epidemiology and Medical Statistics, Department of Public Health and Primary Health Care, University of Bergen, Bergen, Norway.

<sup>2</sup> Division of Epidemiology, Norwegian Institute of Public Health, Bergen, Norway.

<sup>3</sup> Division of Epidemiology, Norwegian Institute of Public Health, Oslo, Norway.

<sup>4</sup> MRC Centre for Causal Analyses in Translational Epidemiology, Department of Social Medicine, University of Bristol, Bristol, United Kingdom.

Received for publication November 26, 2007; accepted for publication March 19, 2008.

The prevalence of obesity in childhood and adolescence has increased worldwide. Long-term effects of adolescent obesity on cause-specific mortality are not well specified. The authors studied 227,000 adolescents (aged 14–19 years) measured (height and weight) in Norwegian health surveys in 1963–1975. During follow-up (8 million person-years), 9,650 deaths were observed. Cox proportional hazards regression was used to compare cause-specific mortality among individuals whose baseline body mass index (BMI) was below the 25th percentile, between the 75th and 84th percentiles, and above the 85th percentile in a US reference population with that of individuals whose BMI was between the 25th and 75th percentiles. Risk of death from endocrine, nutritional, and metabolic diseases and from circulatory system diseases was increased in the two highest BMI categories for both sexes. Relative risks of ischemic heart disease death were 2.9 (95% confidence interval (CI): 2.3, 3.6) for males and 3.7 (95% CI: 2.3, 5.7) for females in the highest BMI category compared with the reference. There was also an increased risk of death from colon cancer (males: 2.1, 95% CI: 1.1, 4.1; females: 2.0, 95% CI: 1.2, 3.5), respiratory system diseases (males: 2.7, 95% CI: 1.4, 5.2; females: 2.5, 95% CI: 1.4, 4.8), and sudden death (males: 2.2, 95% CI: 1.2, 4.3; females: 2.7, 95% CI: 1.1, 6.6). Adolescent obesity was related to increased mortality in middle age from several important causes.

adolescent; body mass index; cause of death; follow-up studies; mortality; Norway; obesity

Abbreviations: BMI, body mass index; CI, confidence interval; RR, relative risk.

During the last decades, the prevalence of obesity has increased worldwide, and this phenomenon has generally been affecting all age groups (1). Adult obesity is usually associated with increased risk of several chronic diseases, including type 2 diabetes; hypertension; coronary heart disease; stroke; and colon, rectal, esophageal (adenocarcinoma), endometrial, and postmenopausal breast cancer (2–4). Of special concern is the increasing incidence of obesity among children and adolescents. However, the long-term effects of

obesity in childhood and adolescence on morbidity and mortality are not well specified (5, 6).

Despite the wealth of evidence on the adverse consequences of obesity, controversy continues regarding the shape of the relation of body mass index (BMI) with mortality. Many studies show a U-shaped association of BMI with all-cause mortality (7), and, in some influential investigations, the point of inflection—with the lowest level of mortality—is above the cutpoint for overweight (8). Furthermore, some

Correspondence to Prof. Tone Bjørge, Section for Epidemiology and Medical Statistics, Department of Public Health and Primary Health Care, University of Bergen, N-5018 Bergen, Norway (e-mail: tone.bjorge@isf.uib.no).

causes of death, particularly respiratory disease (9) and lung cancer (10), show inverse associations with BMI. It has been argued that the excess mortality among people whose BMI is lower than the optimal point may be generated by a mixture of reverse causation (early stages of disease lead to weight loss) and confounding, by cigarette smoking in particular (11). One approach to this issue is to investigate the predictive value of BMI measured at subadulthood ages, when smoking will be uncommon and weight loss due to developing chronic disease will not have occurred.

Previously, data from the national tuberculosis screening program in Norway were used to explore the association between body size in adolescence and total mortality (12). A higher risk of death with higher BMI was observed among both males and females. The aim of this study was to use the material from the tuberculosis screening program in Norway with extended follow-up and cause-of-death information to further investigate the associations between BMI and cause-specific mortality in a cohort comprising 227,000 males and females aged 14–19 years at measurement.

## MATERIALS AND METHODS

### Subjects

During 1963–1975, height and weight were measured as part of a screening program aimed at detecting tuberculosis in the general Norwegian population (13–15). The mass examination was compulsory for individuals aged 15 years or older, but height and weight were also measured in some individuals less than 15 years of age. Among those aged 15 years or older, the attendance rate was about 85 percent. This material (which included data on nearly 230,000 individuals aged 14–19 years) has been described previously, and the impact of height and weight on morbidity and mortality has been reported (12, 14, 15). In this study, extended follow-up of the individuals allowed for a considerably more detailed cause-of-death analysis than conducted previously.

Body weight was measured by using scales calibrated regularly and was noted to the nearest half kilogram. Body height was measured and noted to the nearest centimeter. Height was measured without shoes, and weight was measured with the subject wearing light clothing.

In this study, all individuals measured at ages 14–19 years were included, except those whose measurements were not performed according to the protocol, individuals who declined to be measured, individuals with disabilities, or women who claimed to be pregnant. Altogether, 226,682 individuals were eligible for the analysis. BMI was defined as (weight in kg)/(height in meters)<sup>2</sup>. Information on covariates other than sex, age, time of measurement, and area of residence was not available.

All residents of Norway are assigned a unique 11-digit identification number. By linkage to the Cause of Death Registry at Statistics Norway, it was possible to follow the individuals in this study from date of measurement until emigration, cause-specific death, or January 1, 2005, whichever occurred first. Four individuals were lost to follow-up.

Causes of death (underlying causes) were coded according to the European short list for causes of death (16). For

diabetes, however, subanalyses were performed in which we also included this diagnosis if it was recorded anywhere on the death certificate.

### Statistical analysis

Multivariate Cox proportional hazards regression models, with time since measurement as the time variable, were fitted to obtain relative risk estimates of death from different causes (17). It was assumed that the hazard function for an individual with a covariate vector  $\mathbf{x} = (x_1, x_2, \dots, x_p)'$  could be expressed by  $h(t; \mathbf{x}) = h_0(t) \times \exp(\mathbf{x}' \times \boldsymbol{\beta})$ , where  $h_0(t)$  represents the hazard function for an individual with covariate values all equal to 0, and  $\boldsymbol{\beta} = (\beta_1, \beta_2, \dots, \beta_p)'$  is a vector of regression coefficients. The first measurement obtained at ages 14–19 years was used. In the analyses, the following three categorized variables were included:

1. Age at measurement: 14–16 years, 17–19 years.
2. Year of birth: 1943–1949,  $\geq 1950$ .
3. BMI at baseline: Followed the guidelines of the Centers for Disease Control and Prevention/National Center for Health Statistics (18, 19) by using percentiles in a US reference population: <3rd, 3rd–4th, 5th–9th, 10th–24th, 25th–74th, 75th–84th, 85th–94th,  $\geq 95$ th. In the results presented in the last two tables of this paper, the categories were combined into four: <25th, 25th–74th, 75th–84th, and  $\geq 85$ th.

The proportionality assumption in the Cox model was assessed by inspecting log-minus-log plots. Analyses were performed separately for each sex. The statistical package SPSS (20) was used for estimating relative risks of death from specific causes, with 95 percent confidence intervals.

The hazard function of death (overall and from specific causes) by BMI in the Cox model was estimated by using penalized spline functions in S-plus, with 4 degrees of freedom (21). The four parts of figure 1 were derived from models including continuous variables for age at measurement and year of birth in addition to a variable for BMI corresponding to the percentiles in the reference population (18), assigned the values 1, 2, ..., 8. The relative risk of a point  $a$  compared with a point  $b$  on the  $x$ -axis can be calculated by using the graphs to find the corresponding  $y$  values,  $y_a$  and  $y_b$ , and then calculate the relative risk by  $e^{y_a - y_b}$ .

## RESULTS

A total of 226,678 individuals (114,977 males and 111,701 females; mean age, 17.0 years) were followed for on average 34.9 years (range, 0.0–41.5), comprising 7,900,414 person-years (table 1). Among these individuals, 9,650 deaths were observed. Mean age at death was 40 years for males and 43 years for females. For 63.4 percent of the males and 64.6 percent of the females, BMIs were between the 25th and 75th percentiles of the US reference population, whereas BMIs for 5.2 percent of the males and 8.0 percent of the females were above the 85th US reference percentile.

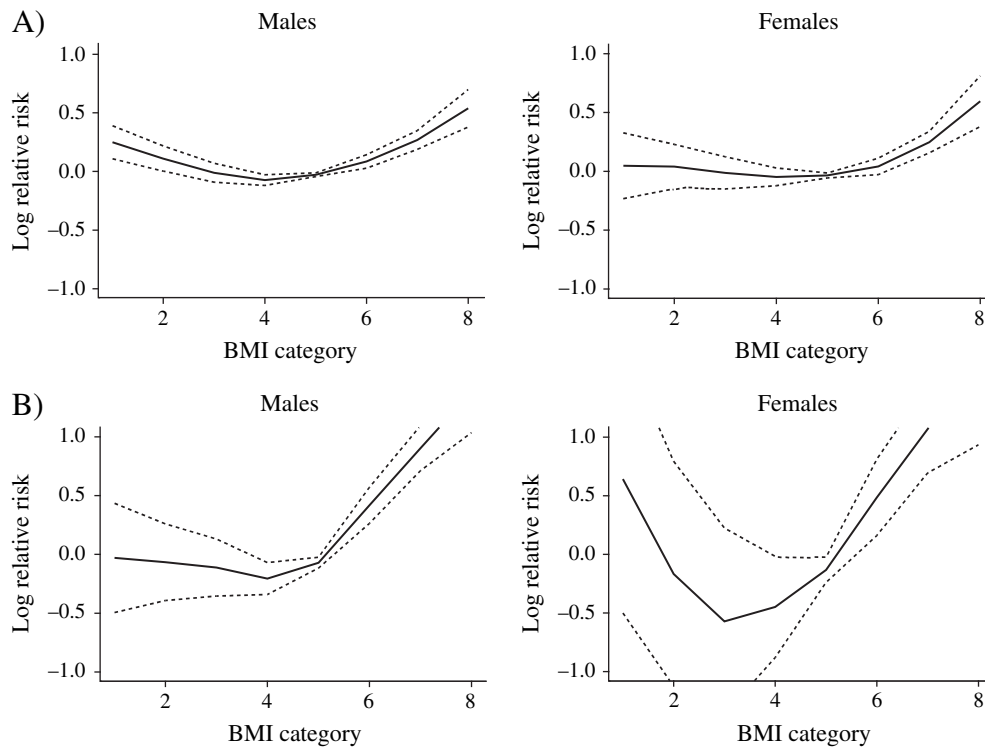

**FIGURE 1.** Logarithm of the hazard functions of death (solid line) with 95% confidence intervals (dashed lines), by body mass index (BMI) category (based on percentiles in a US reference population (18)—1: <3rd; 2: 3rd–4th; 3: 5th–9th; 4: 10th–24th; 5: 25th–74th; 6: 75th–84th; 7: 85th–94th; 8:  $\geq$ 95th), from spline functions with 4 degrees of freedom, for persons in Norway measured in 1963–1975. Adjusted for age and birth year. A) total mortality, B) ischemic heart disease mortality.

Tables 2 and 3 show the relative risks of cause-specific mortality for males and females, respectively, according to different categories of baseline BMI. Compared with those for the reference group (BMI, 25th–74th percentiles in the reference population), the relative risks of death from endocrine, nutritional, and metabolic diseases and from diseases of the circulatory system were elevated in the two highest BMI groups of both males and females. The relative risks of death from diseases of the respiratory system and symptoms, signs, abnormal findings, and ill-defined causes were increased in the highest BMI group of both sexes.

For diseases of the circulatory system, ischemic heart disease was the dominant cause of death in males, whereas cerebrovascular disease was dominant in females. For both males and females, the risk of death from ischemic heart disease was increased in the two highest BMI categories (males: relative risk (RR) = 1.8, 95 percent confidence interval (CI): 1.5, 2.3 and RR = 2.9, 95 percent CI: 2.3, 3.6; females: RR = 2.1, 95 percent CI: 1.3, 3.4 and RR = 3.7, 95 percent CI: 2.3, 5.7). For males, the risk of death from other heart diseases and cerebrovascular diseases was increased in the highest BMI category as well. Furthermore, the risk of death from subarachnoid hemorrhage was increased in both the highest (RR = 1.9, 95 percent CI: 0.9, 3.8) and lowest (RR = 1.7, 95 percent CI: 1.1, 2.5) BMI categories.

For females, there was an increased risk of death from cerebrovascular diseases in the lowest BMI category (RR = 1.7, 95 percent CI: 1.2, 2.5) and a moderately increased risk of death from subarachnoid hemorrhage in this BMI category (RR = 1.5, 95 percent CI: 0.9, 2.5). However, the risk of death from subarachnoid hemorrhage was not increased in the highest BMI category of females.

The risk of death from diabetes mellitus was also increased for males with both low and high BMIs. When diabetes was analyzed both as underlying cause and mentioned on the death certificate, the relative risks of death were 1.8 (95 percent CI: 1.1, 2.8) and 3.6 (95 percent CI: 2.4, 5.5) for males and 2.6 (95 percent CI: 1.4, 4.7) and 5.6 (95 percent CI: 3.3, 9.6) for females in the two highest BMI categories. The total number of deaths for which diabetes was the underlying cause and was mentioned on the death certificate was 196 for males and 76 for females.

There was an increased risk of sudden death for both sexes (males: RR = 2.2, 95 percent CI: 1.2, 4.3; females: RR = 2.7, 95 percent CI: 1.1, 6.6) and of death from chronic lower respiratory diseases for males (RR = 4.1, 95 percent CI: 1.8, 9.0) in the highest BMI category. Respiratory mortality was also elevated among both men and women whose BMI was low. There was no association between BMI and mortality resulting from mental and behavioral disorders.

**TABLE 1. Numbers of deaths and individuals in different categories and overall sex-specific death rates for males and females measured in 1963–1975, Norway**

| Variable                       | Males         |                    |                           |             | Females       |                    |                           |             |
|--------------------------------|---------------|--------------------|---------------------------|-------------|---------------|--------------------|---------------------------|-------------|
|                                | No. of deaths | No. of individuals | Proportion of individuals | Death rate* | No. of deaths | No. of individuals | Proportion of individuals | Death rate* |
| No. of years since measurement |               |                    |                           |             |               |                    |                           |             |
| 0–4                            | 605           | 114,977            | 100                       | 106         | 151           | 111,701            | 100                       | 27          |
| 5–9                            | 541           | 114,210            | 99                        | 95          | 142           | 110,826            | 99                        | 26          |
| 10–14                          | 513           | 113,417            | 99                        | 91          | 216           | 110,047            | 99                        | 39          |
| 15–19                          | 614           | 112,639            | 98                        | 109         | 279           | 109,438            | 98                        | 51          |
| 20–24                          | 851           | 111,781            | 97                        | 153         | 475           | 108,861            | 97                        | 88          |
| 25–29                          | 1,165         | 110,679            | 96                        | 212         | 654           | 108,160            | 97                        | 122         |
| 30–34                          | 1,377         | 107,698            | 94                        | 297         | 894           | 105,639            | 95                        | 196         |
| ≥35                            | 687           | 66,138             | 58                        | 432         | 486           | 65,818             | 59                        | 300         |
| Age (years) at measurement     |               |                    |                           |             |               |                    |                           |             |
| 14–16                          | 3,111         | 59,316             | 52                        | 150         | 1,561         | 57,480             | 51                        | 77          |
| 17–19                          | 3,242         | 55,661             | 48                        | 169         | 1,736         | 54,221             | 49                        | 92          |
| Year of birth                  |               |                    |                           |             |               |                    |                           |             |
| 1940–1949                      | 1,753         | 24,679             | 21                        | 190         | 1,024         | 25,149             | 23                        | 108         |
| ≥1950                          | 4,600         | 90,298             | 79                        | 150         | 2,273         | 86,552             | 77                        | 77          |
| Body mass index category†      |               |                    |                           |             |               |                    |                           |             |
| <3rd                           | 167           | 2,373              | 2                         | 206         | 37            | 1,296              | 1                         | 83          |
| 3rd–4th                        | 104           | 1,690              | 1                         | 178         | 35            | 953                | 1                         | 107         |
| 5th–9th                        | 268           | 4,824              | 4                         | 161         | 81            | 2,912              | 3                         | 80          |
| 10th–24th                      | 927           | 18,367             | 16                        | 146         | 358           | 12,856             | 12                        | 80          |
| 25th–74th                      | 3,915         | 72,922             | 63                        | 154         | 2,044         | 72,211             | 65                        | 81          |
| 75th–84th                      | 528           | 8,802              | 8                         | 172         | 390           | 12,591             | 11                        | 88          |
| 85th–94th                      | 330           | 4,803              | 4                         | 198         | 290           | 7,797              | 7                         | 106         |
| ≥95th                          | 114           | 1,196              | 1                         | 278         | 62            | 1,085              | 1                         | 163         |
| Total                          | 6,353         | 114,977            | 100                       | 159         | 3,297         | 111,701            | 100                       | 84          |

\* No. of deaths per 100,000 person-years.

† Percentiles in a US reference population (18).

The relative risk of overall cancer death was moderately increased in the highest BMI group (males: RR = 1.2, 95 percent CI: 0.9, 1.5; females: RR = 1.2, 95 percent CI: 1.1, 1.5). Both males and females in the highest BMI category had an increased risk of death from colon cancer (RR = 2.1, 95 percent CI: 1.1, 4.1 and RR = 2.0, 95 percent CI: 1.2, 3.5, respectively). The risk of breast cancer did not differ across BMI categories, and this finding was not altered when the risks of death at less than 50 years of age and at age 50 years or older were examined separately. For females, there was also an increased risk of death from cervical cancer in the highest BMI category.

Analyses of total mortality omitting the first 15 years of follow-up gave results similar to those presented in tables 2 and 3. Likewise, examining participants measured at ages 14–16 and 17–19 years separately revealed findings similar to those for the whole cohort.

The hazard functions of the risk of death by BMI were estimated by using spline functions (figure 1). The association between the relative risk of death and BMI was almost U-shaped for all-cause mortality and for ischemic heart diseases. However, the proportion of persons in the left part of the U was small, as shown in table 1.

## DISCUSSION

Analyses of the associations between BMI in adolescence and cause-specific mortality in a large Norwegian cohort revealed an increased risk of death from diseases of the circulatory system, most strongly from ischemic heart disease, and from endocrine, nutritional, and metabolic diseases in those whose BMI was high. There was also an increased risk of death from diseases of the respiratory system, colon cancer, and sudden death for adolescents whose BMI was

**TABLE 2. For males measured in 1963–1975, relative risks of death (cause-specific and overall mortality) with 95% confidence intervals, adjusted for age and birth year, by body mass index in adolescence, Norway**

| Cause of death                                         | Body mass index category ((weight in kg)/(height in meters) <sup>2</sup> ) in adolescence* |     |          |                                           |     |                                        |     |          |                                    |     |          | p value† |
|--------------------------------------------------------|--------------------------------------------------------------------------------------------|-----|----------|-------------------------------------------|-----|----------------------------------------|-----|----------|------------------------------------|-----|----------|----------|
|                                                        | <25th<br>(942,467<br>person-years)                                                         |     |          | 25th–74th<br>(2,539,557<br>person-years)‡ |     | 75th–84th<br>(307,375<br>person-years) |     |          | ≥85th<br>(207,816<br>person-years) |     |          |          |
|                                                        | No. of<br>deaths                                                                           | RR§ | 95% CI§  | No. of<br>deaths                          | RR  | No. of<br>deaths                       | RR  | 95% CI   | No. of<br>deaths                   | RR  | 95% CI   |          |
| Malignant neoplasms                                    | 285                                                                                        | 0.9 | 0.8, 1.0 | 836                                       | 1.0 | 101                                    | 1.0 | 0.8, 1.2 | 77                                 | 1.2 | 0.9, 1.5 | 0.2      |
| Colon                                                  | 21                                                                                         | 1.0 | 0.6, 1.6 | 59                                        | 1.0 | 7                                      | 1.0 | 0.4, 2.2 | 10                                 | 2.1 | 1.1, 4.1 | 0.1      |
| Larynx and trachea/bronchus/lung                       | 57                                                                                         | 1.1 | 0.8, 1.5 | 144                                       | 1.0 | 16                                     | 0.9 | 0.6, 1.5 | 13                                 | 1.2 | 0.7, 2.0 | 0.5      |
| Lymphatic/hematopoietic tissue                         | 57                                                                                         | 1.1 | 0.8, 1.5 | 139                                       | 1.0 | 15                                     | 0.9 | 0.5, 1.5 | 13                                 | 1.2 | 0.7, 2.1 | 0.3      |
| Endocrine, nutritional, and metabolic diseases         | 38                                                                                         | 1.4 | 1.0, 2.1 | 68                                        | 1.0 | 19                                     | 2.4 | 1.4, 4.0 | 13                                 | 2.5 | 1.4, 4.5 | 0.5      |
| Diabetes mellitus                                      | 32                                                                                         | 1.7 | 1.1, 2.6 | 49                                        | 1.0 | 12                                     | 2.1 | 1.1, 4.0 | 7                                  | 1.9 | 0.8, 4.1 | 0.1      |
| Mental and behavioral disorders                        | 87                                                                                         | 1.2 | 0.9, 1.6 | 197                                       | 1.0 | 17                                     | 0.7 | 0.4, 1.2 | 12                                 | 0.7 | 0.4, 1.3 | 0.05     |
| Diseases of the circulatory system                     | 240                                                                                        | 1.0 | 0.8, 1.1 | 660                                       | 1.0 | 139                                    | 1.8 | 1.5, 2.1 | 129                                | 2.5 | 2.1, 3.0 | <0.001   |
| Ischemic heart diseases                                | 149                                                                                        | 1.0 | 0.8, 1.2 | 411                                       | 1.0 | 89                                     | 1.8 | 1.5, 2.3 | 93                                 | 2.9 | 2.3, 3.6 | <0.001   |
| Other heart diseases                                   | 24                                                                                         | 0.8 | 0.5, 1.2 | 82                                        | 1.0 | 14                                     | 1.4 | 0.8, 2.5 | 12                                 | 1.8 | 1.0, 3.4 | 0.2      |
| Cerebrovascular diseases                               | 52                                                                                         | 1.2 | 0.9, 1.7 | 115                                       | 1.0 | 17                                     | 1.2 | 0.7, 2.0 | 18                                 | 1.9 | 1.2, 3.2 | 1.0      |
| Diseases of the respiratory system                     | 30                                                                                         | 1.5 | 1.0, 2.4 | 52                                        | 1.0 | 7                                      | 1.1 | 0.5, 2.5 | 11                                 | 2.7 | 1.4, 5.2 | 0.1      |
| Chronic lower respiratory diseases                     | 13                                                                                         | 1.4 | 0.7, 2.8 | 25                                        | 1.0 | 4                                      | 1.3 | 0.5, 3.8 | 8                                  | 4.1 | 1.8, 9.0 | 0.6      |
| Digestive system diseases                              | 64                                                                                         | 1.2 | 0.9, 1.6 | 144                                       | 1.0 | 16                                     | 0.9 | 0.5, 1.5 | 16                                 | 1.4 | 0.8, 2.3 | 0.1      |
| Chronic liver disease                                  | 46                                                                                         | 1.3 | 0.9, 1.8 | 99                                        | 1.0 | 13                                     | 1.1 | 0.6, 1.9 | 10                                 | 1.3 | 0.7, 2.4 | 0.3      |
| Symptoms, signs, abnormal findings, ill-defined causes | 41                                                                                         | 0.7 | 0.5, 1.1 | 147                                       | 1.0 | 24                                     | 1.4 | 0.9, 2.1 | 20                                 | 1.7 | 1.1, 2.7 | 0.02     |
| Sudden death                                           | 16                                                                                         | 0.7 | 0.4, 1.2 | 62                                        | 1.0 | 8                                      | 1.1 | 0.5, 2.3 | 11                                 | 2.2 | 1.2, 4.3 | 0.003    |
| External causes of injury and poisoning                | 574                                                                                        | 1.0 | 0.9, 1.1 | 1,526                                     | 1.0 | 172                                    | 0.9 | 0.8, 1.1 | 137                                | 1.1 | 0.9, 1.3 | 0.9      |
| Suicide and intentional self-harm                      | 186                                                                                        | 1.1 | 0.9, 1.3 | 454                                       | 1.0 | 62                                     | 1.1 | 0.9, 1.5 | 37                                 | 1.0 | 0.7, 1.4 | 0.7      |
| Other                                                  | 107                                                                                        | 1.0 | 0.8, 1.3 | 285                                       | 1.0 | 33                                     | 1.0 | 0.7, 1.4 | 29                                 | 1.3 | 0.9, 1.9 | 0.6      |
| Total                                                  | 1,466                                                                                      | 1.0 | 0.9, 1.1 | 3,915                                     | 1.0 | 528                                    | 1.1 | 1.0, 1.2 | 444                                | 1.4 | 1.3, 1.6 | 0.006    |

\* Categorized according to percentiles in a US reference population (18).

† p value for test of linear trend using body mass index in eight categories (<3rd, 3rd–4th, 5th–9th, 10th–24th, 25th–74th, 75th–84th, 85th–94th, ≥95th) as a continuous variable.

‡ Reference category.

§ RR, relative risk; CI, confidence interval.

very high (above the 85th percentile in the US reference population) at baseline.

### Strengths and limitations

One of the major strengths of this study is the large number of individuals included, being recruited from a compulsory national tuberculosis screening program in Norway in the 1960s and 1970s and followed up for more than 30 years. Furthermore, the measurements were performed in a standardized way. Follow-up of the study subjects was almost complete by using national population-based registries; of the 226,682 individuals eligible for the study, 97.9 percent were registered as either being alive by the end of follow-up or having died. Altogether, 2.1 percent had emigrated, and only four individuals were lost to follow-up.

A weakness of our study is the lack of information on potential confounders other than age, sex, and year of birth.

Potential confounders include social class/socioeconomic position, physical activity, diet, weight changes during follow-up, prevalent diseases at the time of measurement, and smoking. The socioeconomic confounding of adolescent BMI during this time period is likely to be small but cannot be excluded, particularly among the females (22). However, our finding that the BMI–mortality relation appears to be specific (BMI is associated with some outcomes but not others) provides some evidence against a general effect generated by confounding by socioeconomic position. To investigate the possibility that weight was influenced by persistent diseases at the time of measurement, we conducted analyses for total mortality omitting the first 15 years of follow-up. Similar results were found.

Lifetime smoking habits of Norwegian men and women born between 1890 and 1974 have been described previously (23). The proportion of ever smokers was 40–50 percent among males and 30–40 percent among females in the

**TABLE 3. For females measured in 1963–1975, relative risks of death (cause-specific and overall mortality) with 95% confidence intervals, adjusted for age and birth year, by body mass index in adolescence, Norway**

| Cause of death                                         | Body mass index category ((weight in kg)/(height in meters) <sup>2</sup> ) in adolescence* |     |          |                                           |     |                                        |     |          |                                    |     |          | p value† |
|--------------------------------------------------------|--------------------------------------------------------------------------------------------|-----|----------|-------------------------------------------|-----|----------------------------------------|-----|----------|------------------------------------|-----|----------|----------|
|                                                        | <25th<br>(625,238<br>person-years)                                                         |     |          | 25th–74th<br>(2,522,523<br>person-years)‡ |     | 75th–84th<br>(443,257<br>person-years) |     |          | ≥85th<br>(312,180<br>person-years) |     |          |          |
|                                                        | No. of<br>deaths                                                                           | RR§ | 95% CI§  | No. of<br>deaths                          | RR  | No. of<br>deaths                       | RR  | 95% CI   | No. of<br>deaths                   | RR  | 95% CI   |          |
| Malignant neoplasms                                    | 235                                                                                        | 0.9 | 0.8, 1.0 | 1,075                                     | 1.0 | 193                                    | 1.0 | 0.9, 1.2 | 166                                | 1.2 | 1.1, 1.5 | 0.004    |
| Colon                                                  | 13                                                                                         | 0.8 | 0.5, 1.5 | 63                                        | 1.0 | 16                                     | 1.4 | 0.8, 2.5 | 16                                 | 2.0 | 1.2, 3.5 | 0.02     |
| Larynx and trachea/bronchus/lung                       | 34                                                                                         | 1.1 | 0.7, 1.6 | 130                                       | 1.0 | 16                                     | 0.7 | 0.4, 1.2 | 18                                 | 1.1 | 0.7, 1.8 | 0.5      |
| Breast                                                 | 61                                                                                         | 0.8 | 0.6, 1.1 | 290                                       | 1.0 | 55                                     | 1.1 | 0.8, 1.4 | 31                                 | 0.9 | 0.6, 1.2 | 0.6      |
| Cervix uteri                                           | 12                                                                                         | 0.7 | 0.4, 1.2 | 72                                        | 1.0 | 12                                     | 0.9 | 0.5, 1.7 | 17                                 | 1.9 | 1.1, 3.2 | 0.007    |
| Ovary                                                  | 24                                                                                         | 1.1 | 0.7, 1.7 | 88                                        | 1.0 | 16                                     | 1.0 | 0.6, 1.7 | 7                                  | 0.6 | 0.3, 1.4 | 0.2      |
| Lymphatic/hematopoietic tissue                         | 18                                                                                         | 0.7 | 0.4, 1.1 | 107                                       | 1.0 | 21                                     | 1.1 | 0.7, 1.8 | 14                                 | 1.1 | 0.6, 1.8 | 0.3      |
| Endocrine, nutritional, and metabolic diseases         | 5                                                                                          | 0.9 | 0.3, 2.3 | 23                                        | 1.0 | 14                                     | 3.5 | 1.8, 6.8 | 16                                 | 5.7 | 3.0, 11  | <0.001   |
| Diabetes mellitus                                      | 0                                                                                          |     |          | 16                                        |     | 13                                     |     |          | 14                                 |     |          |          |
| Mental and behavioral disorders                        | 13                                                                                         | 1.2 | 0.6, 2.2 | 44                                        | 1.0 | 4                                      | 0.5 | 0.2, 1.4 | 8                                  | 1.5 | 0.7, 3.1 | 0.8      |
| Diseases of the circulatory system                     | 65                                                                                         | 1.3 | 1.0, 1.8 | 194                                       | 1.0 | 52                                     | 1.5 | 1.1, 2.1 | 57                                 | 2.4 | 1.8, 3.2 | 0.001    |
| Ischemic heart diseases                                | 15                                                                                         | 1.0 | 0.5, 1.7 | 62                                        | 1.0 | 23                                     | 2.1 | 1.3, 3.4 | 28                                 | 3.7 | 2.3, 5.7 | <0.001   |
| Other heart diseases                                   | 8                                                                                          |     |          | 18                                        |     | 7                                      |     |          | 3                                  |     |          |          |
| Cerebrovascular diseases                               | 36                                                                                         | 1.7 | 1.2, 2.5 | 86                                        | 1.0 | 16                                     | 1.1 | 0.6, 1.8 | 16                                 | 1.5 | 0.9, 2.6 | 0.2      |
| Diseases of the respiratory system                     | 18                                                                                         | 1.9 | 1.1, 3.2 | 40                                        | 1.0 | 11                                     | 1.5 | 0.8, 3.0 | 13                                 | 2.5 | 1.4, 4.8 | 0.4      |
| Chronic lower respiratory diseases                     | 14                                                                                         | 1.8 | 1.0, 3.4 | 32                                        | 1.0 | 8                                      | 1.4 | 0.6, 3.0 | 8                                  | 1.9 | 0.9, 4.2 | 1.0      |
| Digestive system diseases                              | 13                                                                                         | 0.9 | 0.5, 1.6 | 60                                        | 1.0 | 14                                     | 1.3 | 0.7, 2.3 | 9                                  | 1.2 | 0.6, 2.4 | 0.6      |
| Chronic liver disease                                  | 11                                                                                         | 1.1 | 0.5, 2.1 | 42                                        | 1.0 | 9                                      | 1.2 | 0.6, 2.5 | 3                                  | 0.6 | 0.2, 1.8 | 0.4      |
| Symptoms, signs, abnormal findings, ill-defined causes | 9                                                                                          | 0.8 | 0.4, 1.7 | 42                                        | 1.0 | 8                                      | 1.1 | 0.5, 2.3 | 12                                 | 2.4 | 1.2, 4.5 | 0.01     |
| Sudden death                                           | 1                                                                                          | 0.2 | 0.0, 1.5 | 19                                        | 1.0 | 3                                      | 0.9 | 0.3, 3.1 | 6                                  | 2.7 | 1.1, 6.6 | 0.001    |
| External causes of injury and poisoning                | 107                                                                                        | 1.1 | 0.9, 1.4 | 394                                       | 1.0 | 67                                     | 1.0 | 0.7, 1.2 | 39                                 | 0.8 | 0.6, 1.1 | 0.2      |
| Suicide and intentional self-harm                      | 55                                                                                         | 1.4 | 1.0, 1.8 | 166                                       | 1.0 | 25                                     | 0.8 | 0.6, 1.3 | 12                                 | 0.6 | 0.3, 1.0 | 0.01     |
| Other                                                  | 46                                                                                         | 1.1 | 0.8, 1.5 | 172                                       | 1.0 | 27                                     | 0.9 | 0.6, 1.3 | 32                                 | 1.5 | 1.0, 2.2 | 0.8      |
| Total                                                  | 511                                                                                        | 1.0 | 0.9, 1.1 | 2,044                                     | 1.0 | 390                                    | 1.1 | 1.0, 1.2 | 352                                | 1.4 | 1.2, 1.5 | <0.001   |

\* Categorized according to percentiles in a US reference population (18).

† p value for test of linear trend using body mass index in eight categories (<3rd, 3rd–4th, 5th–9th, 10th–24th, 25th–74th, 75th–84th, 85th–94th, ≥95th) as a continuous variable.

‡ Reference category.

§ RR, relative risk; CI, confidence interval.

birth cohorts included in our study. However, BMI was unrelated to death from lung cancer in our study, the cause of death most strongly associated with smoking, despite several other studies showing an inverse association of BMI with risk of lung cancer mortality. Our study may have not shown this finding because BMI was assessed either before people had begun smoking or before they had been smoking for many years. However, we did find elevated respiratory disease mortality among those whose BMI was low. This finding is in agreement with studies of older adults (9). The fact that lung cancer risk was not elevated in this group suggests that confounding by smoking is not the explanation.

### Comparison with other studies

Low BMI is an adverse prognostic factor once chronic obstructive pulmonary disease has developed (24). It has been suggested that chronic pulmonary disease reflects a process of abnormal inflammatory response to inhaled agents—a process that may begin early and that leads to a systemic inflammatory response, weight loss, and skeletal muscle atrophy (25). This hypothesis that the early stages of lung disease lead to weight loss or inhibited weight gain, rather than higher BMI being protective against poor respiratory health, could be tested by using the Mendelian randomization approach (26) through relating *FTO*, a common

genetic variant associated with higher BMI, to respiratory health outcome measures. If there were indeed a protective effect of higher BMI, then individuals carrying genetic variants associated with higher BMI should be at lower risk of indices of poor respiratory health.

In addition to raised respiratory mortality among those with low BMI, elevated mortality is seen at high BMI. Studies have suggested that obesity is a risk factor for adult asthma. In a Norwegian prospective study exploring the relation between body weight and asthma, the risk of asthma increased steadily with BMI in both males and females (27). Epidemiologic studies have also suggested an association between obesity and asthma in children, and longitudinal studies have produced convincing evidence for an overall relation of asthma incidence to baseline obesity (28). In our study, there was an increased risk of death from diseases of the respiratory system for individuals (males and females) in the highest BMI category and an increased risk of death from chronic lower respiratory diseases for males.

There is much concern that the rise in childhood and adolescent obesity will result in increased risk of cardiovascular diseases in the future. However, the evidence in support of this concern is somewhat uncertain (5, 29–31). A recent Danish study showed that higher BMI during childhood (ages 7–13 years) was associated with an increased risk of coronary heart disease in adulthood (32). In a Dutch nested case-control study, the adjusted coronary heart disease mortality risk ratio was 2.5 for men whose BMI was  $\geq 25$  at age 18 years (30). The results from three historical cohort studies in Great Britain did not, however, provide strong evidence that being overweight or obese in childhood, adolescence, and young adulthood was associated with future risk of cardiovascular disease (5). In our study, there was a large increase in risk of death from ischemic heart disease for both males and females whose BMI was above the 75th percentile at baseline compared with the reference category.

Our findings of an increased risk of mortality below the age of 60 years from heart disease and other causes associated with high BMI are supported by a recent US study by Flegal et al. (33). However, in that study, age and weight were measured after age 25 years. We previously explored the persistence of obesity from adolescence into adulthood (34). Whether the excess mortality among obese adolescents can be ascribed to obesity in adolescence or to later obesity, however, is difficult to determine. Although some of the reverse causation in the association between adult BMI and mortality will be removed by using adolescent BMI, we still observed a U-shaped relation between BMI and mortality in middle age.

Both cohort and case-control studies have shown positive associations between adult BMI and risk of colorectal cancer, especially colon cancer. The relation has generally been more consistent and stronger for men than for women (35). A follow-up of the Harvard Growth Study of 1922–1935 showed an increased risk of colorectal cancer mortality for men who were overweight in adolescence. However, the number of cases was small (6). In addition, results from the Harvard Alumni Health Study demonstrated that overweight during young adulthood was associated with higher risk of colon cancer, although less important than overweight during

middle age (36). We found an increased risk of mortality from colon cancer for both males and females in the highest BMI category (above the 85th percentile), most pronounced for individuals being measured at ages 17–19 years.

BMI as a measure of adiposity in adolescents is not ideal. However, a workshop on childhood obesity convened by the International Obesity Task Force in 1997 concluded that BMI offers a reasonable measure of fatness in children and adolescents (37).

Although follow-up in the present study was up to 42 years, the oldest persons were aged 61 years (mean, 52) when exiting the study. Consequently, the study relates to excess mortality in early adulthood through to middle age, which is also reflected in the relative frequency of the different causes of death.

## Conclusion

In this study, obesity in adolescence was related to increased mortality from several important causes of death in middle age. Increasing levels of obesity in adolescence could presage adverse trends in these causes of death in future decades. The causal nature of the few causes of death we found to be associated with low BMI in adolescence needs to be investigated by using innovative research methods.

## ACKNOWLEDGMENTS

Conflict of interest: none declared.

## REFERENCES

1. Wang Y, Beydoun MA. The obesity epidemic in the United States—gender, age, socioeconomic, racial/ethnic, and geographic characteristics: a systematic review and meta-regression analysis. *Epidemiol Rev* 2007;29:6–28.
2. WCRF/AICR. Second expert report. Food, nutrition, physical activity, and the prevention of cancer: a global perspective. World Cancer Research Fund/American Institute for Cancer Research, 2007. (<http://www.dietandcancerreport.org/?p=ER>).
3. Hart CL, Hole DJ, Lawlor DA, et al. How many cases of type 2 diabetes mellitus are due to being overweight in middle age? Evidence from the Midspan prospective cohort studies using mention of diabetes mellitus on hospital discharge or death records. *Diabet Med* 2007;24:73–80.
4. Kopelman PG. Obesity as a medical problem. *Nature* 2000;404:635–43.
5. Lawlor DA, Martin RM, Gunnell D, et al. Association of body mass index measured in childhood, adolescence, and young adulthood with risk of ischemic heart disease and stroke: findings from 3 historical cohort studies. *Am J Clin Nutr* 2006;83:767–73.
6. Must A, Jacques PF, Dallal GE, et al. Long-term morbidity and mortality of overweight adolescents. A follow-up of the Harvard Growth Study of 1922 to 1935. *N Engl J Med* 1992;327:1350–5.
7. Engeland A, Bjørge T, Selmer RM, et al. Height and body mass index in relation to total mortality. *Epidemiology* 2003;14:293–9.

8. Flegal KM, Graubard BI, Williamson DF, et al. Excess deaths associated with underweight, overweight, and obesity. *JAMA* 2005;293:1861–7.
9. Jee SH, Sull JW, Park J, et al. Body-mass index and mortality in Korean men and women. *N Engl J Med* 2006;355:779–87.
10. Calle EE, Rodriguez C, Walker-Thurmond K, et al. Overweight, obesity, and mortality from cancer in a prospectively studied cohort of U.S. adults. *N Engl J Med* 2003;348:1625–38.
11. Manson JE, Stampfer MJ, Hennekens CH, et al. Body weight and longevity. A reassessment. *JAMA* 1987;257:353–8.
12. Engeland A, Bjørge T, Sjøgaard AJ, et al. Body mass index in adolescence in relation to total mortality: 32-year follow-up of 227,000 Norwegian boys and girls. *Am J Epidemiol* 2003;157:517–23.
13. Bjartveit K. The National Health Screening Service: from fight against tuberculosis to many-sided epidemiological activities. (In Norwegian). *Nor Epidemiol* 1997;7:157–74.
14. Tverdal A. Body mass index and incidence of tuberculosis. *Eur J Respir Dis* 1986;69:355–62.
15. Waaler HT. Height, weight and mortality. The Norwegian experience. *Acta Med Scand Suppl* 1984;679:1–56.
16. Health Statistics: atlas on mortality in the European Union: data 1994–96. Luxembourg: Office for Official Publications of the European Communities, 2002. (ISBN 92-894-3727-8).
17. Cox DR, Oakes D. Analysis of survival data. London, United Kingdom: Chapman and Hall Ltd, 1984.
18. Kuczumski RJ, Ogden CL, Grummer-Strawn LM, et al. CDC growth charts: United States. *Adv Data* 2000;Jun 8:1–27.
19. National Center for Health Statistics. 2000 CDC growth charts: United States. (<http://www.cdc.gov/growthcharts/>). (Accessed December 8, 2002).
20. SPSS for Windows, release 13.0. Chicago, IL: SPSS Inc, 2004.
21. S-plus 6.1 for Windows. Seattle, WA: Insightful Corporation, 2002.
22. Sobal J, Stunkard AJ. Socioeconomic status and obesity: a review of the literature. *Psychol Bull* 1989;105:260–75.
23. Rønneberg A, Lund KE, Hafstad A. Lifetime smoking habits among Norwegian men and women born between 1890 and 1974. *Int J Epidemiol* 1994;23:267–76.
24. Landbo C, Prescott E, Lange P, et al. Prognostic value of nutritional status in chronic obstructive pulmonary disease. *Am J Respir Crit Care Med* 1999;160:1856–61.
25. Agusti A, Thomas A, Neff Lecture. Chronic obstructive pulmonary disease: a systemic disease. *Proc Am Thorac Soc* 2006;3:478–81.
26. Davey Smith G, Ebrahim S. ‘Mendelian randomization’: can genetic epidemiology contribute to understanding environmental determinants of disease? *Int J Epidemiol* 2003;32:1–22.
27. Nystad W, Meyer HE, Nafstad P, et al. Body mass index in relation to adult asthma among 135,000 Norwegian men and women. *Am J Epidemiol* 2004;160:969–76.
28. Chinn S. Obesity and asthma. *Paediatr Respir Rev* 2006;7:223–8.
29. Gunnell DJ, Frankel SJ, Nanchahal K, et al. Childhood obesity and adult cardiovascular mortality: a 57-y follow-up study based on the Boyd Orr cohort. *Am J Clin Nutr* 1998;67:1111–18.
30. Hoffmans MD, Kromhout D, Coulander CD. Body mass index at the age of 18 and its effects on 32-year-mortality from coronary heart disease and cancer. A nested case-control study among the entire 1932 Dutch male birth cohort. *J Clin Epidemiol* 1989;42:513–20.
31. Lawlor DA, Leon DA. Association of body mass index and obesity measured in early childhood with risk of coronary heart disease and stroke in middle age: findings from the Aberdeen children of the 1950s prospective cohort study. *Circulation* 2005;111:1891–6.
32. Baker JL, Olsen LW, Sorensen TI. Childhood body-mass index and the risk of coronary heart disease in adulthood. *N Engl J Med* 2007;357:2329–37.
33. Flegal KM, Graubard BI, Williamson DF, et al. Cause-specific excess deaths associated with underweight, overweight, and obesity. *JAMA* 2007;298:2028–37.
34. Engeland A, Bjørge T, Tverdal A, et al. Obesity in adolescence and adulthood and the risk of adult mortality. *Epidemiology* 2004;15:79–85.
35. Engeland A, Tretli S, Austad G, et al. Height and body mass index in relation to colorectal and gallbladder cancer in two million Norwegian men and women. *Cancer Causes Control* 2005;16:987–96.
36. Lee IM, Paffenbarger RS Jr. Quetelet’s index and risk of colon cancer in college alumni. *J Natl Cancer Inst* 1992;84:1326–31.
37. Bellizzi MC, Dietz WH. Workshop on childhood obesity: summary of the discussion. *Am J Clin Nutr* 1999;70:173S–5S.
